# Supplementary material for: OnSIDES (ON-label SIDE effectS resource) Database : Extracting Adverse Drug Events from Drug Labels using Natural Language Processing Models
Source: bioRxiv or medRxiv preprint supplement (doi:10.1101/2024.03.22.24304724), 2024-03-24
Supplement: Supplementary file [file media-1.pdf]

## **Supplementary Materials for “*OnSIDES (ON-label SIDE effectS resource) Database : Extracting Adverse Drug Events from Drug Labels using Natural Language Processing Models*”**

**Table 1 : Acronyms Used in this Publication**

ADE : Adverse Drug Events  
AR : Adverse Reactions  
ATC : Anatomical Therapeutic Chemical  
AUROC : Area Under Receiver-Operating Characteristic curve  
BERT : Bidirectional Encoder Representations from Transformers  
BW : Boxed Warnings  
EMA : European Medicines Agency  
EMC : Electronic Medicines Compendium  
FAERS : FDA Adverse Event Reporting System  
FDA : Food and Drug Administration  
MedDRA : Medical Dictionary for Regulatory Activities  
MedDRA HLT : MedDRA High-Level Terms  
MedDRA LLT : MedDRA Lowest Level Terms  
MedDRA PT : MedDRA Preferred Terms  
MedDRA SOC : MedDRA System Organ Classes  
MHRA : Medicines and Healthcare products Regulatory Agency  
NLP : Natural Language Processing  
NIH NLM : National Institutes of Health, National Library of Medicine  
PMDA : Pharmaceuticals and Medical Devices Agency  
SHAP : SHapley Additive exPlanations  
SmPC : Summary of Product Characteristics  
SMILES : Simplified Molecular-Input Line-Entry System  
SNOMED CT : Systemized NOMenclature of MEDicine, Clinical Terms  
SP : Special Populations  
SPL : Structured Product Labels  
WP : Warnings and Precautions  
XML : Extensible Markup Language

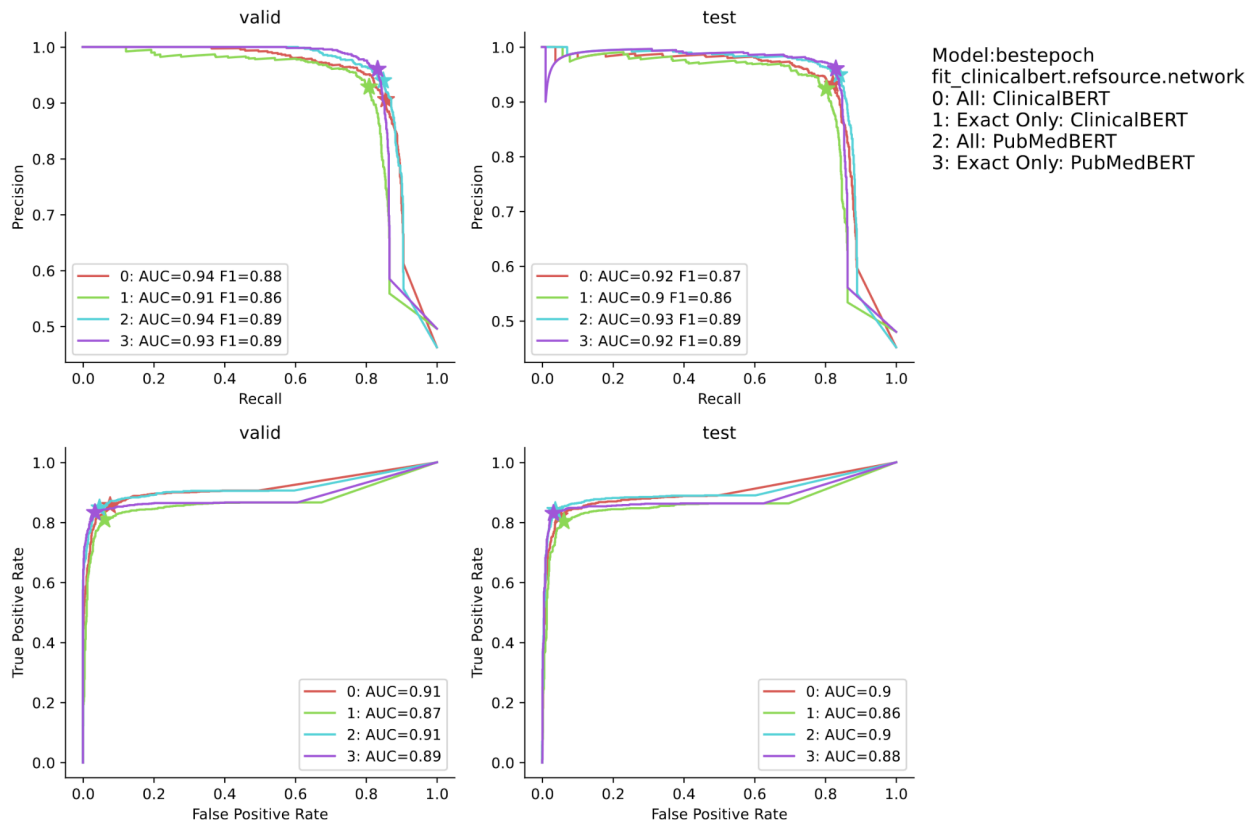

**Supplementary Figure 1: A Comparison of Input String Types for ClinicalBERT/PubMedBERT models.**

A comparison of the ClinicalBERT/PubMedBERT models' performance when trained on both DeepCADRME-extracted and exact-matched strings, and only exact-matched strings. We see a marginal improvement in performance when the either model is trained on both the DeepCADRME-extracted and exact-matched strings.

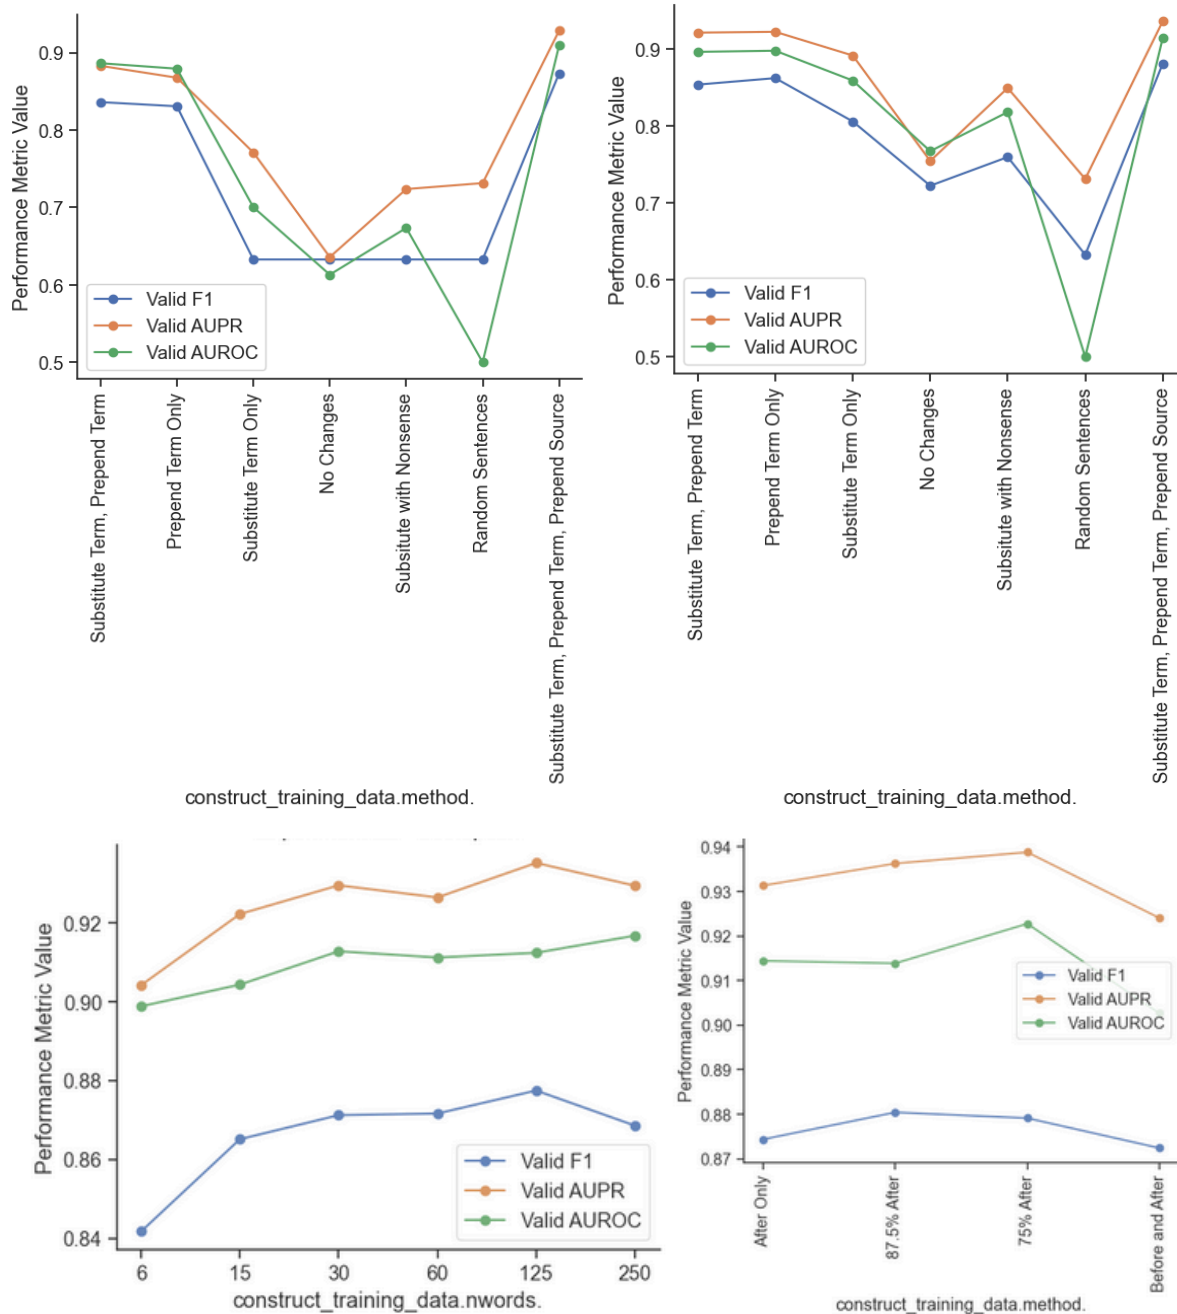

**Supplementary Figure 2 : A Comparison of Input String Format for ClinicalBERT / PubMedBERT models.**

A comparison of the ClinicalBERT (left)/PubMedBERT (right) models' performance when trained on both DeepCADRME-extracted and exact-matched strings, and only exact-matched strings. We see a marginal improvement in performance when the either model is trained on both the DeepCADRME-extracted and exact-matched strings.

C. The model performs best when we use a 125 word input string (Test AUROC : 0.900 / F1 : 0.877), closely followed by the 60 word input string (Test AUROC : 0.900 / F1 : 0.867).

D. The model achieved peak performance when 87.5% of words in the string came after the term, followed by 75% after the term in question.

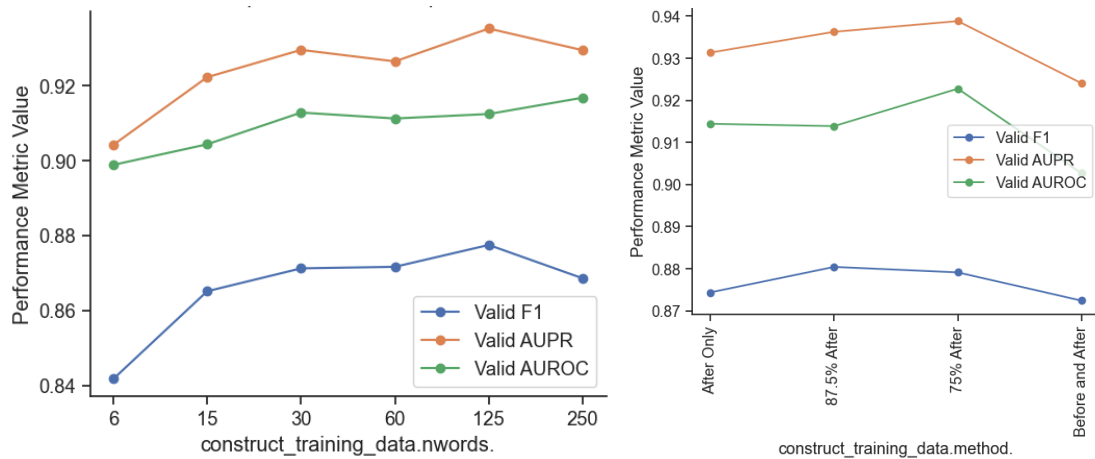

**Supplementary Figure 3 : Comparison of Prediction Performance with Differing Input String Lengths and Pre/Post String Splits.**

Figure A. The model performs best when we use a 125 word input string (Test AUROC : 0.900 / F1 : 0.877), closely followed by the 60 word input string (Test AUROC : 0.900 / F1 : 0.867).

Figure B. The model achieved peak performance when 87.5% of words in the string came after the term, followed by 75% after the term in question.

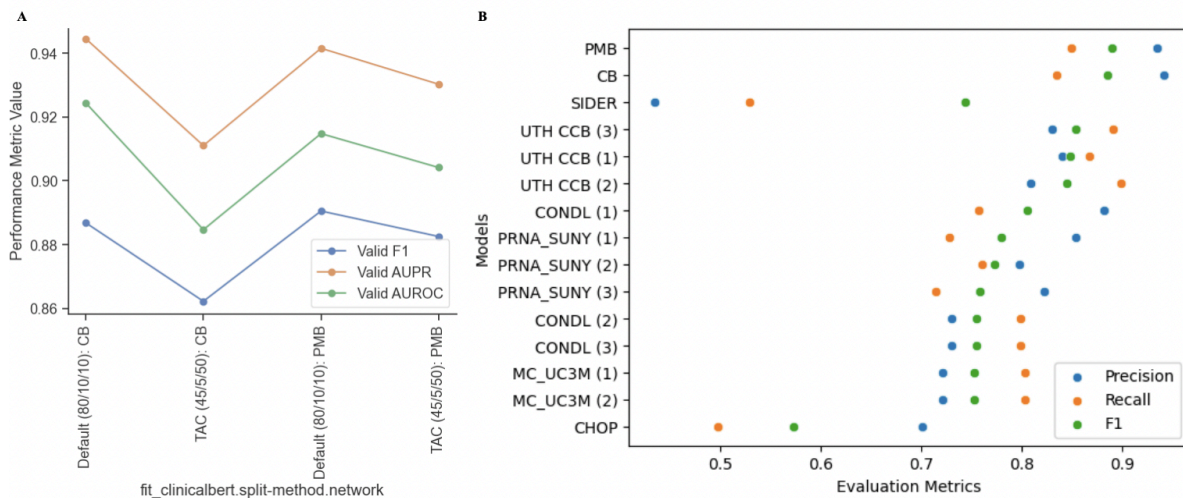

**Supplementary Figure 4 : Comparison of Prediction Performance between ClinicalBERT, PubMedBERT, and TAC 2017 Models**

Figure A. A comparison of the best-performing ClinicalBERT (CB) and PubMedBERT (PB) models with varying train/validation/test splits. PubMedBERT performs modestly better than ClinicalBERT, and more consistently across two different evaluations (our evaluation, and the TAC 2017 evaluation).

Figure B. The PubMedBERT model performs better than the models submitted for the TAC 2017 ADE Track Task as described by Demner-Fushman et al., and additionally against the compiled SIDER database.
